# Supplementary material
Source: publisher figshare collection journal article supplement (https://gsajournals.figshare.com/ndownloader/files/26031341)
Supplement: Supplementary file 1 [file 26031341]

MATERIALS AND METHODS

Coho salmon were reared at a Fisheries and Oceans Canada facility in West Vancouver, BC, Canada. This laboratory is equipped with physical containment facilities to prevent the escape of transgenic fish. Experiments were conducted meeting the Canadian Council on Animal Care guidelines under approval of the Pacific Region Animal Care Committee (Permit Numbers: AUP 11-020- R1A2 and AUP 15-001).

**Transgenic coho salmon production and rearing:**

The fast-growing M77 strain of GH transgenic coho salmon (Devlin *et al.* 2004) was used in this study (referred to as transgenic). The OnMTGH1 growth hormone transgene construct (Devlin *et al.* 1994) is located at a single genomic locus in this strain (Phillips and Devlin 2009). The M77 strain has been repeatedly backcrossed to non-transgenic individuals of the progenitor strain (Devlin *et al.* 2009) collected from the Fisheries and Oceans Canada Chehalis River Hatchery, British Columbia (49°16’N, 121°15’W). Transgenic and non-transgenic coho salmon were produced from crosses fertilized on January 31, 2014. Non-transgenic coho salmon were generated from ten single-pair crosses between ten females and ten males collected from the Chehalis River Hatchery. Using the same dams, hemizygous transgenic coho were generated from single-pair crosses between ten females (non-transgenic) and ten males homozygous for the M77 transgene — producing half-sibs to the non-transgenic salmon. The fertilized eggs were reared in Heath trays supplied with filtered well water (11.2˚C) until ponding (first feeding) at which time non-transgenic and transgenic crosses were separately pooled to create multi-family populations. On April 14, 2014, fish were transferred into 200 L circular tanks supplemented with 10˚C aerated well water under simulated natural photoperiod. The salmon were reared in tanks for two weeks to increase viability during the following experiment. This time also allows yolk sacs to be absorbed and ensure that the experimental salmon are all feeding on exogenous food and are at a similar developmental stage.

**Experimental conditions:**

After two weeks of *ad libitum* feeding of a commercial aquaculture diet (Skretting Canada Ltd., Vancouver, Canada), salmon were transferred to either stream or tank environments. The first weight measurements were taken during the transfer. The stream experiments were conducted within a translucent fabric-covered building. Eighty transgenic and 80 non-transgenic salmon were transferred to a naturalized stream tank (4.3 x 0.9 x 0.4 m) supplied with unfiltered and non-temperature controlled Cypress Creek (British Columbia, Canada) fresh water. The naturalized stream environmental conditions were the same as those used in previous studies that identified phenotypic plasticity for behavioural traits and ecological effects (Sundström *et al.* 2007). The stream bottom was covered in gravel and the top was covered with clear plexiglass for indirect natural lighting. Logs, rocks and artificial plants were placed in the tanks for environmental enrichment and to encourage natural foraging behaviour. Fish were fed with aquatic insects brought in by the creek, and by daily supplementation with natural foods (frozen bloodworms, mysis shrimp and live juvenile crickets). Fish were fed 5 days a week at random time intervals. The amounts of food were the same as described in Sundström et al. (2007), and these levels of food are in sufficient excess that ensured non-transgenic coho salmon grow at a rate equivalent to that seen in nature. The same precautionary procedures from (Sundström et al. (2007) were taken to minimize anthropogenic impacts (e.g., random feeding times and random approaches to the stream).

The tank experiments were conducted within a concrete building containing circular fibreglass tanks. Populations of 3,500 non-transgenic and 3,500 transgenic fry (at <0.5g) were transferred to separate 4000 L circular tanks supplied with aerated and filtered well-water. The fish were reared under a simulated natural photoperiod and standard aquaculture conditions. Non-transgenic and transgenic fish were fed to satiation three times daily with age-appropriate commercial salmon feed (as above).

For tissue collections, all fish were sampled at the same body size to minimize influences due to developmental stage (White *et al.* 2013). Fish of a target weight of 5.0 g were euthanized in a bath of MS-222 (200 mg/L buffered with 400mg/L of sodium bicarbonate). After ventilation ceased, the second weight measurements were taken and liver tissue was rapidly collected and preserved in RNALater (for RNA extraction). Tank-reared transgenic fish were euthanized on July 31, 2014 (n=12, w=4.98±0.04g), and tank-reared non-transgenic fish were euthanized on August 15, 2014 when they reached the same body size as transgenic fish (n=12, w=4.95±0.04g). Fish reared in the stream environment were euthanized on February 27, 2015 (n=27, w=4.96±0.01g). Genotyping for the presence of the OnMTGH1 transgene (see Fitzpatrick et al. 2011) was used to determine the genotype of the fish from the stream environment (n = 14 non-transgenic, w=4.93±0.09g, and n = 13 hemizygous transgenic, w=4.94±0.10g). Note that only a single sampling time was needed for stream-reared fish since both non-transgenic and transgenic salmon grew nearly at the same rate in this environment.

**Growth:**

Specific growth rate (SGR) was calculated as SGR = (lnWt2 – lnWt1)/days, where Wt1 is the first weight measurement (transfer to experimental tank or stream), Wt2 is the second weight measurement (at sampling), and days is the interval between measurements. A two-way ANOVA was used to assess significance (ɑ ≤ 0.5) for environment, genotype, and genotype-by-environment interaction for SGR and weight.

**RNA-sequencing:**

Total liver RNA was extracted using an RNeasy Mini Kit (Qiagen) with DNase treatment (Qiagen). For each condition (stream non-transgenic, stream transgenic, tank non-transgenic, and tank transgenic), equimolar RNA was pooled (6 individuals / pool, with two pools per condition). This approach reduces the variance of individual replicates, but also reduces the number of replicates and hence allows assessment of multiple individuals at an overall reduced cost. RNA-seq was performed at McGill University and Génome Québec Innovation Centre on an Illumina HiSeq2000 with 100 bp paired-end (PE) reads. Filtered (Trimmomatic (Bolger *et al.* 2014), -phred33, ILLUMINACLIP:(NCBI UniVec):2:20:7, LEADING:20, TRAILING:20, SLIDINGWINDOW:30:30, MINLEN:60), high-quality paired-end reads were mapped against the reference coho salmon genome (NCBI genome accession number: GCA_002021735.1 with the transgene sequence added) using Gsnap v2016-06-09 software (Wu *et al.* 2016) with a maximum of 5 mismatches allowed, and allowing detection of novel splicing events. Properly mapped read counts were assessed using HTSeq software (Anders *et al.* 2015) and differential expression analysis was conducted in edgeR (Robinson *et al.* 2010), a package in the R environment (R Core Team 2018).

**RNA-seq analyses:**

In edgeR, genes expressed at a low level were first filtered by expression level using the filterByExpr function with default values (library sizes were recalculated after filtering). A normalization factor was used to reduce the effect of a few genes monopolizing the sequencing data (calcNormFactors), and the gene expression dispersion was calculated using the estimateDisp function. The glmQLFit function was then used to fit the data. Pairwise comparisons were performed between the stream transgenic (ST) and stream non-transgenic (SNT), stream transgenic and tank transgenic (TT), stream non-transgenic and tank non-transgenic (TNT), and the tank transgenic and tank non-transgenic groups using the glmQLFTest function. An ANOVA-style (i.e. all comparisons) and genotype-by-environment test ([SNT - TNT] - [ST – TT]) were also performed using the same function to identify any genes that were significantly differentially expressed between any of the comparisons or had GxE interactions. Significant GxE interactions were plotted with the heatmap function in R using counts per million transcripts (reads per kbp per million). Clustering of genes identified in the GxE analysis was performed in R by first finding pairwise correlations using the cor function (method = “spearman”) of average (of the replicates) counts per million. These correlations were then clustered with the as.dendrogram and cutree functions in the dendextend library (Galili 2015). The number of clusters (k=24, in the cutree function) was chosen based on the number of leaves in the dendrogram produced by the as.dendrogram function (default settings).

**Whole-genome bisulfite sequencing:**

A DNeasy Blood and Tissue Kit (QIAGEN) was used for the extraction of liver genomic DNA (gDNA) after rinsing the tissue 3-5x with 1x PBS. Equimolar gDNA was pooled for each condition (see above) and sequenced on a HiSeq X Illumina with 150 bp PE reads at McGill University and Génome Québec Innovation Centre where whole-genome bisulfite sequencing (WGBS) library preparation was performed. The same individuals were used for both the RNA-seq pools (see above) and the whole-genome bisulfite sequencing (WGBS) pools.

High quality PE reads (fastp (Chen *et al.* 2018), --length_required=70, --qualified_quality_phred=25, --correction, --trim_tail1=1, --trim_tail2=1) were mapped against the reference coho salmon genome using Walt v1.0 software (Chen *et al.* 2016) (-m 6 -k 3 -N 5000000). The alignment files were screened for putative PCR-duplicates using MethPipe (Song *et al.* 2013) v3.4.3 ‘duplicate-remover’ function and symmetric CpG positions were combined using the ‘symmetric-cpgs’ function. The output from MethPipe was converted to dss format using bash commands, which were further converted to bismark format using custom python scripts (File S2).

**Whole-genome bisulfite sequencing (WGBS) analyses:**

Methylation counts were read into edgeR using the readBismark2DGE function. The distances between genes and methylation sites were calculated using a custom python script and the NCBI generated gff file with gene annotations (File S2). This information was used in R to limit the differential methylation analysis to promoter regions (2000 bp upstream to 1000 bp downstream of the transcriptional start site), gene body regions (transcriptional start site to the end of the gene—including introns), and intergenic sites not in either the promoter or gene body regions (individually tested). DNA strand information was used to correct start and end positions on the negative strand. Library sizes were re-calculated after partitioning the data. Only sites or regions with a minimum coverage of eight (i.e. the sum of all methylated or unmethylated sites needed to meet or exceed eight for all samples) were retained for analysis, and the site or region needed at least one methylation count and one unmethylated count. The library size was recalculated after filtering and the same scale was set for methylated and unmethylated counts. Estimated dispersion was calculated using the estimateDisp function and the data was fit using the glmFit function. The same pairwise comparisons were performed as in the RNA-seq section (i.e. ST vs. SNT, ST vs. TT, SNT vs. TNT, and TT vs. TNT) using the glmLRT function along with ANOVA-style and GxE analyses in edgeR.

**Gene ontology analyses:**

Gene ontology followed the methodology used in Christensen et al. (2019). Blast2Go (version 5 Basic) (Shiryev *et al.* 2007; Götz *et al.* 2008) was used to generate GO annotations from the UniProtKB database (March 28, 2018) (The UniProt Consortium 2017) and coho salmon proteins annotated by NCBI from the coho salmon genome (GCA_002021735.1) (max hits 5 + default parameters for all other steps). Isoforms were removed from the annotation file using custom python scripts available from Christensen et al. (2019). In order to test for GO term enrichment, gene names were converted to protein names (as the annotation file produced from Blast2GO was generated using protein sequences) and redundant isoforms were removed using custom python scripts from Christensen et al. (2019). GO term enrichment was determined by using a Fisher’s exact test in Blast2GO (using default settings).

To reduce the complexity of the enriched GO terms (as there were several hundred in some cases), REVIGO software (Supek *et al.* 2011) was used (settings: small-0.5, GO term size-Danio rerio, semantic similarity measure - SimRel). The scatterplot figures of the biological process GO categories were chosen to display the enriched GO terms, but the data was still too complex to display all the labels of the reduced enriched GO terms. Evenly spaced labels were retained (except where noted) for readability and because nearby categories are expected to have similar function.

REFERENCES

Anders, S., P. T. Pyl, and W. Huber, 2015 HTSeq--a Python framework to work with high-throughput sequencing data. Bioinforma. Oxf. Engl. 31: 166–169.

Bolger, A. M., M. Lohse, and B. Usadel, 2014 Trimmomatic: a flexible trimmer for Illumina sequence data. Bioinformatics 30: 2114–2120.

Chen, H., A. D. Smith, and T. Chen, 2016 WALT: fast and accurate read mapping for bisulfite sequencing. Bioinforma. Oxf. Engl. 32: 3507–3509.

Chen, S., Y. Zhou, Y. Chen, and J. Gu, 2018 fastp: an ultra-fast all-in-one FASTQ preprocessor. Bioinformatics 34: i884–i890.

Christensen, K. A., D. Sakhrani, E. B. Rondeau, J. Richards, B. F. Koop *et al.*, 2019 Effect of triploidy on liver gene expression in coho salmon (Oncorhynchus kisutch) under different metabolic states. BMC Genomics 20: 336.

Devlin, R. H., C. A. Biagi, and T. Y. Yesaki, 2004 Growth, viability and genetic characteristics of GH transgenic coho salmon strains. Aquaculture 236: 607–632.

Devlin, R. H., D. Sakhrani, W. E. Tymchuk, M. L. Rise, and B. Goh, 2009 Domestication and growth hormone transgenesis cause similar changes in gene expression in coho salmon (Oncorhynchus kisutch). Proc. Natl. Acad. Sci. 106: 3047–3052.

Devlin, R. H., T. Y. Yesaki, C. A. Biagi, E. M. Donaldson, P. Swanson *et al.*, 1994 Extraordinary salmon growth. Nature 371: 209–210.

Fitzpatrick, J. L., H. Akbarashandiz, D. Sakhrani, C. A. Biagi, T. E. Pitcher *et al.*, 2011 Cultured growth hormone transgenic salmon are reproductively out-competed by wild-reared salmon in semi-natural mating arenas. Aquaculture 312: 185–191.

Galili, T., 2015 dendextend: an R package for visualizing, adjusting and comparing trees of hierarchical clustering. Bioinforma. Oxf. Engl. 31: 3718–3720.

Götz, S., J. M. García-Gómez, J. Terol, T. D. Williams, S. H. Nagaraj *et al.*, 2008 High-throughput functional annotation and data mining with the Blast2GO suite. Nucleic Acids Res. 36: 3420–3435.

Phillips, R. B., and R. H. Devlin, 2009 Integration of growth hormone gene constructs in transgenic strains of coho salmon (Oncorhynchus kisutch) at centromeric or telomeric sites. Genome 53: 79–82.

R Core Team, 2018 *R: A Language and Environment for Statistical Computing*. R Foundation for Statistical Computing, Vienna, Austria.

Robinson, M. D., D. J. McCarthy, and G. K. Smyth, 2010 edgeR: a Bioconductor package for differential expression analysis of digital gene expression data. Bioinforma. Oxf. Engl. 26: 139–140.

Shiryev, S. A., J. S. Papadopoulos, A. A. Schäffer, and R. Agarwala, 2007 Improved BLAST searches using longer words for protein seeding. Bioinforma. Oxf. Engl. 23: 2949–2951.

Song, Q., B. Decato, E. E. Hong, M. Zhou, F. Fang *et al.*, 2013 A Reference Methylome Database and Analysis Pipeline to Facilitate Integrative and Comparative Epigenomics. PLOS ONE 8: e81148.

Sundström, L. F., M. Lõhmus, W. E. Tymchuk, and R. H. Devlin, 2007 Gene–environment interactions influence ecological consequences of transgenic animals. Proc. Natl. Acad. Sci. 104: 3889–3894.

Supek, F., M. Bošnjak, N. Škunca, and T. Šmuc, 2011 REVIGO Summarizes and Visualizes Long Lists of Gene Ontology Terms. PLOS ONE 6: e21800.

The UniProt Consortium, 2017 UniProt: the universal protein knowledgebase. Nucleic Acids Res. 45: D158–D169.

White, S. L., D. Sakhrani, R. G. Danzmann, and R. H. Devlin, 2013 Influence of developmental stage and genotype on liver mRNA levels among wild, domesticated, and hybrid rainbow trout (Oncorhynchus mykiss). BMC Genomics 14: 673.

Wu, T. D., J. Reeder, M. Lawrence, G. Becker, and M. J. Brauer, 2016 GMAP and GSNAP for Genomic Sequence Alignment: Enhancements to Speed, Accuracy, and Functionality, pp. 283–334 in *Statistical Genomics: Methods and Protocols*, edited by E. Mathé and S. Davis. Methods in Molecular Biology, Springer New York, New York, NY.
